# Supplementary material for: Infection by Parorchis acanthus (Trematoda) decreases grazing by the keystone gastropod, Littoraria irrorata
Source: PeerJ. 2018 Mar 27;6:e4544. doi: 10.7717/peerj.4544 (PMC5877444; doi:10.7717/peerj.4544)
Supplement: Supplemental Information 1 [file peerj-06-4544-s001.xlsx]

## Sheet: I. Grazing Assay
Cup	Leaf Width (mm)	Ungrazed Foil Weight (g)	Grazed Foil Weight (g)	Ungrazed Leaf Wet Weight (g)	Grazed Leaf Wet Weight (g)	Ungrazed Leaf Dry Weight w/ Foil (g)	Grazed Leaf Dry Weight w/ Foil (g)	Ungrazed Dry Weight (g)	Grazed dry Weight (g)	Difference in Dry Weights (g)	g Consumed/ g Snail Dry Biomass	Radulations (cm)	Sex	Infection Status	Snail Wet Weight (g)	Tin Weight (g)	Shell Weight (g)	Tin+Snail Wet Weight (No Shell)	Snail Wet Biomass (No Shell)	Snail Shell Length (mm)	Snail Dry Weight (w/ Tin) (g)	Snail Dry Biomass
1	8.3	0.24903	0.20231	0.06654	0.06645	0.27026	0.22337	0.02123	0.02106	0.00017	0.00362473	0	m	infected	1.5808	1.0509	1.3461	1.2856	0.2347	18.1	1.0978	0.0469
2	8.1	0.19254	0.16468	0.06244	0.06242	0.21344	0.18533	0.0209	0.02065	0.00025	0.00393082	0.2	f	infected	1.5489	1.0305	1.3505	1.2289	0.1984	18.5	1.0941	0.0636
3	7.2	0.16317	0.15385	0.0449	0.04492	0.17986	0.17019	0.01669	0.01634	0.00035	0.00776053	0.5	f	infected	1.444	1.0493	1.2284	1.2649	0.2156	17.4	1.0944	0.0451
4	7.6	0.18386	0.15925	0.0409	0.04093	0.19943	0.17482	0.01557	0.01557	0	0	0	m	infected	1.9123	1.0301	1.6392	1.3032	0.2731	19.7	1.0951	0.065
5	7.2	0.20002	0.15946	0.03419	0.03416	0.21378	0.17304	0.01376	0.01358	0.00018	0.00246238	0.25	m	infected	1.6242	1.0061	1.2647	1.3656	0.3595	18.8	1.0792	0.0731
6	7.8	0.20415	0.18742	0.0592	0.05928	0.22281	0.20568	0.01866	0.01826	0.0004	0.00792079	0.25	f	infected	1.4715	1.0585	1.2296	1.3004	0.2419	17.9	1.109	0.0505
7	7.5	0.25496	0.139	0.04417	0.04451	0.27166	0.15569	0.0167	0.01669	1e-05	0.000185185	0	m	infected	1.7226	1.0583	1.402	1.3789	0.3206	18.7	1.1123	0.054
8	7.3	0.19985	0.14236	0.04571	0.04543	0.21636	0.15884	0.01651	0.01648	3e-05	0.000402145	0	f	infected	1.8951	1.0557	1.6861	1.2647	0.209	20.2	1.1303	0.0746
9	8.2	0.14617	0.19757	0.05165	0.05165	0.16386	0.21497	0.01769	0.0174	0.00029	0.00765172	0	f	infected	1.3843	1.0572	1.3329	1.284	0.2268	18.1	1.0951	0.0379
10	7.6	0.14211	0.21771	0.04474	0.0445	0.15869	0.23425	0.01658	0.01654	4e-05	0.000422833	0	m	infected	1.5896	1.011	1.2695	1.3311	0.3201	17.6	1.1056	0.0946
11	7.8	0.17839	0.14393	0.0435	0.0432	0.19529	0.16082	0.0169	0.01689	1e-05	0.000136426	0	m	infected	2.0342	1.0592	1.6897	1.4037	0.3445	21.3	1.1325	0.0733
12	8.3	0.24509	0.12883	0.05519	0.05517	0.26449	0.14819	0.0194	0.01936	4e-05	0.000787402	0	m	infected	1.4123	1.0291	1.166	1.2754	0.2463	18	1.0799	0.0508
13	8.3	0.15395	0.1486	0.05121	0.05124	0.1725	0.16666	0.01855	0.01806	0.00049	0.00558723	0.8	f	infected	1.6562	1.048	1.3066	1.3976	0.3496	19.2	1.1357	0.0877
14	8.1	0.14788	0.11808	0.04228	0.04216	0.16397	0.13416	0.01609	0.01608	1e-05	0.000119617	0	f	infected	2.1771	1.0451	1.82	1.4022	0.3571	21.1	1.1287	0.0836
15	9	0.17675	0.16785	0.06419	0.06415	0.19785	0.18891	0.0211	0.02106	4e-05	0.00111732	0	f	infected	1.5331	1.0123	1.2755	1.2699	0.2576	20.1	1.0481	0.0358
16	8.7	0.17379	0.1599	0.06533	0.06534	0.19529	0.1807	0.0215	0.0208	0.0007	0.00749465	1.02	f	infected	1.9999	1.038	1.6831	1.3548	0.3168	19.7	1.1314	0.0934
17	8.3	0.1469	0.13663	0.04424	0.04434	0.16384	0.15357	0.01694	0.01694	0	0	0	m	infected	1.6151	1.0339	1.2872	1.3618	0.3279	19	1.094	0.0601
18	8.8	0.15145	0.16519	0.05988	0.05982	0.1715	0.18484	0.02005	0.01965	0.0004	0.0101266	0	f	infected	1.3936	0.9963	1.2107	1.1792	0.1829	17.6	1.0358	0.0395
19	8.3	0.19914	0.17181	0.05248	0.05243	0.21783	0.19016	0.01869	0.01835	0.00034	0.00634328	0	f	infected	1.815	1.0423	1.5851	1.2722	0.2299	20	1.0959	0.0536
20	8.7	0.27154	0.16299	0.04951	0.04925	0.28984	0.1809	0.0183	0.01791	0.00039	0.00515873	0	f	infected	2.0115	1.045	1.6151	1.4414	0.3964	21.4	1.1206	0.0756
21	8.1	0.14157	0.15595	0.03936	0.03946	0.15664	0.17078	0.01507	0.01483	0.00024	0.00321716	0.68	m	infected	1.8778	0.9856	1.5449	1.3185	0.3329	20.6	1.0602	0.0746
22	8.1	0.16699	0.12772	0.04816	0.04813	0.18411	0.14482	0.01712	0.0171	2e-05	0.000326797	0	m	infected	1.643	1.0476	1.3412	1.3494	0.3018	19.7	1.1088	0.0612
23	9.2	0.15821	0.12608	0.06852	0.06853	0.17864	0.1464	0.02043	0.02032	0.00011	0.00143979	0	f	infected	2.1016	1.0365	1.7436	1.3945	0.358	20.5	1.1129	0.0764
24	7.9	0.16594	0.15062	0.0569	0.05692	0.18101	0.16568	0.01507	0.01506	1e-05	0.000133156	0	m	infected	1.7146	1.0385	1.3365	1.4166	0.3781	20.8	1.1136	0.0751
25	8.1	0.1647	0.20744	0.05008	0.05003	0.1833	0.22602	0.0186	0.01858	2e-05	0.00025	0	m	infected	1.3791	1.0124	1.0243	1.3672	0.3548	18.5	1.0924	0.08
26	8.1	0.16537	0.12506	0.05832	0.05822	0.1871	0.14625	0.02173	0.02119	0.00054	0.0100186	1	f	infected	1.5722	1.0267	1.326	1.2729	0.2462	17.8	1.0806	0.0539
27	8.2	0.15119	0.1499	0.06217	0.06219	0.17199	0.17066	0.0208	0.02076	4e-05	0.000722022	0	m	infected	1.6448	1.0272	1.2838	1.3882	0.361	18.7	1.0826	0.0554
28	8	0.1913	0.18543	0.05187	0.05187	0.20999	0.20412	0.01869	0.01869	0	0	0	f	infected	2.1707	1.0137	1.7566	1.4278	0.4141	20.1	1.0959	0.0822
29	7.6	0.17087	0.12497	0.04622	0.04629	0.18769	0.14137	0.01682	0.0164	0.00042	0.00539846	0.5	m	infected	2.0782	1.0468	1.7324	1.3926	0.3458	19.6	1.1246	0.0778
30	7.3	0.18607	0.14003	0.05328	0.05308	0.20222	0.15615	0.01615	0.01612	3e-05	0.000584795	0	m	infected	1.3634	1.0491	1.1591	1.2534	0.2043	18	1.1004	0.0513
31	7.8	0.15957	0.12105	0.05006	0.05009	0.17688	0.13811	0.01731	0.01706	0.00025	0.00474383	0	m	infected	1.4413	1.0544	1.1325	1.1985	0.1441	17.7	1.1071	0.0527
32	7.7	0.22894	0.13934	0.04731	0.04728	0.24597	0.15593	0.01703	0.01659	0.00044	0.00778761	0.54	m	infected	1.568	1.0262	1.3277	1.2665	0.2403	19.8	1.0827	0.0565
33	7.5	0.1668	0.18597	0.04081	0.04074	0.18186	0.20101	0.01506	0.01504	2e-05	0.000506329	0	m	infected	1.3345	1.0217	1.1578	1.1984	0.1767	17.9	1.0612	0.0395
34	6.7	0.14336	0.17191	0.04583	0.04581	0.15914	0.18767	0.01578	0.01576	2e-05	0.000408163	0	m	infected	1.4073	1.0322	1.1736	1.2659	0.2337	18.3	1.0812	0.049
35	6.5	0.19433	0.11034	0.04128	0.04128	0.20889	0.12486	0.01456	0.01452	4e-05	0.000769231	0	m	infected	1.6534	1.0251	1.3543	1.3242	0.2991	18.9	1.0771	0.052
36	5.9	0.17231	0.1845	0.03713	0.03713	0.18558	0.19775	0.01327	0.01325	2e-05	0.000220264	0	f	infected	1.8784	1.0129	1.4604	1.4309	0.418	19.8	1.1037	0.0908
37	5.9	0.17621	0.20615	0.03231	0.03234	0.18825	0.21806	0.01204	0.01191	0.00013	0.00283843	0	m	infected	2.0136	1.0202	1.7636	1.2702	0.25	20.35	1.066	0.0458
38	8.6	0.16371	0.16837	0.06833	0.06841	0.1873	0.19194	0.02359	0.02357	2e-05	0.00037037	0	m	infected	1.4566	1.0271	1.2302	1.2535	0.2264	18.4	1.0811	0.054
39	7.8	0.1732	0.19092	0.04066	0.0408	0.18959	0.20687	0.01639	0.01595	0.00044	0.00971302	0.55	f	infected	1.6286	1.0311	1.347	1.3127	0.2816	18	1.0764	0.0453
40	9.3	0.2235	0.15219	0.07334	0.07333	0.24754	0.17612	0.02404	0.02393	0.00011	0.00296496	0	m	infected	1.0527	1.0152	0.919	1.1489	0.1337	15.8	1.0523	0.0371
41	8.4	0.16901	0.16478	0.05728	0.05778	0.18979	0.18548	0.02078	0.0207	8e-05	0.00159046	0	m	infected	1.5382	1.0462	1.2427	1.3417	0.2955	18.9	1.0965	0.0503
42	8.4	0.18438	0.19203	0.05214	0.0522	0.20433	0.21189	0.01995	0.01986	9e-05	0.00134328	0	f	infected	1.8514	1.0621	1.5498	1.3637	0.3016	19.4	1.1291	0.067
43	8.2	0.16635	0.17666	0.04797	0.04794	0.18485	0.19444	0.0185	0.01778	0.00072	0.0128571	0.5	m	infected	1.6241	1.0507	1.3574	1.3174	0.2667	18.5	1.1067	0.056
44	8.3	0.16184	0.17325	0.07091	0.0708	0.18587	0.19727	0.02403	0.02402	1e-05	0.000186567	0	f	infected	1.4614	1.0336	1.204	1.291	0.2574	18	1.0872	0.0536
45	8.2	0.15802	0.18466	0.05445	0.05449	0.17729	0.2039	0.01927	0.01924	3e-05	0.000429799	0	m	infected	1.524	1.0148	1.2305	1.3083	0.2935	18	1.0846	0.0698
46	8	0.20013	0.20571	0.04642	0.04647	0.21864	0.22419	0.01851	0.01848	3e-05	0.000352526	0	f	infected	2.0449	1.0268	1.6533	1.4184	0.3916	20	1.1119	0.0851
47	8.5	0.18359	0.17498	0.04894	0.04892	0.20068	0.19161	0.01709	0.01663	0.00046	0.00534884	0.82	f	infected	1.8616	1.061	1.4966	1.426	0.365	20.5	1.147	0.086
48	7.8	0.17491	0.19067	0.04783	0.04785	0.19156	0.2073	0.01665	0.01663	2e-05	0.000378788	0	f	infected	1.5221	1.0483	1.2678	1.3026	0.2543	17.6	1.1011	0.0528
49	7.4	0.19853	0.19019	0.0429	0.04291	0.21386	0.205	0.01533	0.01481	0.00052	0.0049952	0.33	m	infected	1.9466	1.0646	1.5407	1.4705	0.4059	20.1	1.1687	0.1041
50	7.4	0.20705	0.20585	0.03899	0.03879	0.2212	0.21996	0.01415	0.01411	4e-05	0.000457666	0	m	infected	1.402	1.0585	1.0816	1.3789	0.3204	18.3	1.1459	0.0874
51	8.7	0.17474	0.2031	0.05553	0.05553	0.19342	0.22177	0.01868	0.01867	1e-05	0.0001287	0	f	infected	1.5124	0.9908	1.161	1.3422	0.3514	18.6	1.0685	0.0777
52	8.2	0.177	0.16205	0.05464	0.0546	0.19767	0.18194	0.02067	0.01989	0.00078	0.0135889	0.5	m	infected	1.5928	1.0044	1.2491	1.3481	0.3437	18.1	1.0618	0.0574
53	7.9	0.23369	0.19368	0.04208	0.04193	0.25093	0.2109	0.01724	0.01722	2e-05	0.000294118	0	f	infected	1.9202	1.0404	1.6056	1.355	0.3146	19.5	1.1084	0.068
54	7.1	0.21806	0.18383	0.02944	0.02963	0.23056	0.19598	0.0125	0.01215	0.00035	0.00440252	0	f	infected	1.6284	1.0472	1.2251	1.4505	0.4033	18.3	1.1267	0.0795
55	8.5	0.19923	0.18368	0.08407	0.0842	0.22561	0.20975	0.02638	0.02607	0.00031	0.003433	0.25	f	infected	2.2719	1.0175	1.9472	1.3422	0.3247	22.8	1.1078	0.0903
56	9	0.16167	0.22975	0.05442	0.0545	0.18161	0.24918	0.01994	0.01943	0.00051	0.00396579	0.32	m	infected	2.0702	0.9864	1.7355	1.3211	0.3347	21.4	1.115	0.1286
57	8.4	0.22293	0.17005	0.03941	0.03954	0.23784	0.18496	0.01491	0.01491	0	0	0	f	infected	1.7649	0.9966	1.3697	1.3918	0.3952	19.1	1.0628	0.0662
58	8.7	0.16926	0.17551	0.07089	0.07086	0.19304	0.19921	0.02378	0.0237	8e-05	0.000933489	0	f	infected	1.6349	1.0023	1.3001	1.3371	0.3348	18.2	1.088	0.0857
59	7.9	0.16358	0.17387	0.0487	0.04855	0.18109	0.19109	0.01751	0.01722	0.00029	0.00282376	0	f	infected	2.2721	1.0212	1.8316	1.4617	0.4405	21.4	1.1239	0.1027
60	8	0.2094	0.16742	0.04383	0.0438	0.22559	0.18345	0.01619	0.01603	0.00016	0.00244648	0	f	infected	1.7655	1.0035	1.4244	1.3446	0.3411	19	1.0689	0.0654
61	7.8	0.19272	0.18207	0.04927	0.04921	0.21113	0.20041	0.01841	0.01834	7e-05	0.000840336	0	m	uninfected	1.5576	1.0482	1.2065	1.3993	0.3511	19.4	1.1315	0.0833
62	7.7	0.16183	0.16948	0.04359	0.04372	0.17924	0.18332	0.01741	0.01384	0.00357	0.041224	5.22	f	uninfected	1.579	1.0459	1.2023	1.4226	0.3767	18.4	1.1325	0.0866
63	7.3	0.22959	0.1904	0.03333	0.03328	0.24317	0.20298	0.01358	0.01258	0.001	0.0699301	2.1	f	uninfected	1.6606	1.0358	1.3179	1.3785	0.3427	19.1	1.0501	0.0143
64	7.2	0.22636	0.18892	0.05095	0.05084	0.24327	0.20356	0.01691	0.01464	0.00227	0.0421933	2.29	m	uninfected	1.6146	1.0423	1.347	1.3099	0.2676	18.3	1.0961	0.0538
65	7	0.15262	0.17876	0.04521	0.04532	0.16841	0.19341	0.01579	0.01465	0.00114	0.0111111	3.73	f	uninfected	2.1354	1.041	1.6674	1.509	0.468	21	1.1436	0.1026
66	7	0.16138	0.22595	0.03576	0.03577	0.17454	0.23479	0.01316	0.00884	0.00432	0.0531365	4.02	m	uninfected	1.5801	1.0477	1.1963	1.4315	0.3838	19	1.129	0.0813
67	7.5	0.20322	0.1838	0.05889	0.05876	0.2221	0.20021	0.01888	0.01641	0.00247	0.0267896	4.54	m	uninfected	1.6652	1.0098	1.2557	1.4193	0.4095	19.6	1.102	0.0922
68	7.4	0.19589	0.25777	0.04878	0.04858	0.21235	0.27311	0.01646	0.01534	0.00112	0.0167164	2.3	f	uninfected	1.8689	0.9909	1.5118	1.348	0.3571	20.4	1.0579	0.067
69	6.4	0.15778	0.22858	0.03829	0.03824	0.17187	0.2398	0.01409	0.01122	0.00287	0.0339243	4.35	m	uninfected	1.5691	1.0217	1.2241	1.3667	0.345	18.8	1.1063	0.0846
70	6.4	0.17481	0.17793	0.03107	0.03095	0.18674	0.1874	0.01193	0.00947	0.00246	0.0288732	3.01	f	uninfected	2.1475	1.0214	1.7287	1.4402	0.4188	21	1.1066	0.0852
71	8.2	0.15728	0.16515	0.0529	0.05287	0.17531	0.18268	0.01803	0.01753	0.0005	0.00775194	0.98	f	uninfected	1.5767	1.004	1.284	1.2967	0.2927	18.7	1.0685	0.0645
72	7.7	0.21409	0.1693	0.04687	0.04671	0.2313	0.18526	0.01721	0.01596	0.00125	0.0180115	1.78	m	uninfected	1.6369	0.9885	1.2798	1.3456	0.3571	18	1.0579	0.0694
73	7.6	0.15042	0.16659	0.04531	0.04522	0.16699	0.18126	0.01657	0.01467	0.0019	0.0277778	4.29	f	uninfected	1.7238	0.9981	1.4155	1.3064	0.3083	19.1	1.0665	0.0684
74	7.5	0.22263	0.16394	0.03164	0.0317	0.23506	0.17577	0.01243	0.01183	0.0006	0.00835655	1.14	m	uninfected	1.6593	0.9951	1.3398	1.3146	0.3195	18.8	1.0669	0.0718
75	7.3	0.16273	0.21389	0.05349	0.05329	0.18104	0.23113	0.01831	0.01724	0.00107	0.00879934	2.63	f	uninfected	2.0947	1.0071	1.6043	1.4975	0.4904	20.5	1.1287	0.1216
76	6.6	0.19812	0.2203	0.04765	0.0475	0.21609	0.23595	0.01797	0.01565	0.00232	0.0396581	3.7	m	uninfected	1.4188	1.0247	1.1623	1.2812	0.2565	18.1	1.0832	0.0585
77	6.3	0.17232	0.14548	0.03614	0.03609	0.18764	0.15903	0.01532	0.01355	0.00177	0.0215328	1.58	f	uninfected	1.5195	1.023	1.1481	1.3944	0.3714	18.5	1.1052	0.0822
78	7.8	0.26353	0.18406	0.05865	0.05863	0.28268	0.20016	0.01915	0.0161	0.00305	0.0344244	4.52	f	uninfected	1.5905	1.0261	1.2289	1.3877	0.3616	18	1.1147	0.0886
79	9.2	0.22996	0.17938	0.06878	0.06873	0.25294	0.20093	0.02298	0.02155	0.00143	0.0152128	3.46	f	uninfected	1.5632	1.0258	1.1731	1.4159	0.3901		1.1198	0.094
80	8.4	0.2203	0.20266	0.05722	0.05724	0.24027	0.21838	0.01997	0.01572	0.00425	0.0357443	3.13	f	uninfected	2.1661	1.0291	1.5571	1.6381	0.609	21.3	1.148	0.1189
81	7.5	0.14267	0.19332	0.03585	0.03583	0.1565	0.20708	0.01383	0.01376	7e-05	0.00102489	0	m	uninfected	1.4242	0.9752	1.1161	1.2833	0.3081	18.3	1.0435	0.0683
82	8.4	0.15747	0.17656	0.0595	0.0596	0.17799	0.19708	0.02052	0.02052	0	0	0	m	uninfected	1.5106	0.986	1.1845	1.3121	0.3261	18.4	1.0543	0.0683
83	8.2	0.17603	0.22307	0.04961	0.04949	0.19434	0.2406	0.01831	0.01753	0.00078	0.00927467	0.9	f	uninfected	1.7056	0.9932	1.3172	1.3816	0.3884	19.3	1.0773	0.0841
84	7.9	0.18621	0.21393	0.03285	0.03277	0.19923	0.22604	0.01302	0.01211	0.00091	0.0102593	1.12	f	uninfected	1.9285	1.0139	1.5932	1.3492	0.3353	19.7	1.1026	0.0887
85	9.7	0.20415	0.17768	0.0703	0.07021	0.22664	0.19885	0.02249	0.02117	0.00132	0.0148649	2.89	f	uninfected	1.9	1.0254	1.491	1.4344	0.409	20.5	1.1142	0.0888
86	6.8	0.1782	0.16696	0.04075	0.04059	0.19309	0.18179	0.01489	0.01483	6e-05	0.000873362	0	f	uninfected	1.727	1.0312	1.4177	1.3405	0.3093	18.39	1.0999	0.0687
87	6.6	0.17027	0.20883	0.03794	0.038	0.18451	0.22272	0.01424	0.01389	0.00035	0.00709939	0.49	m	uninfected	1.3449	1.0386	1.0733	1.3102	0.2716	17.8	1.0879	0.0493
88	6.6	0.17961	0.18834	0.03324	0.03319	0.19255	0.20101	0.01294	0.01267	0.00027	0.00198092	0.35	f	uninfected	2.234	1.0168	1.6371	1.6137	0.5969	21.5	1.1531	0.1363
89	6.6	0.16804	0.18194	0.03556	0.03549	0.18167	0.1955	0.01363	0.01356	7e-05	0.000870647	0	m	uninfected	1.5218	1.0269	1.0898	1.4589	0.432	18.1	1.1073	0.0804
90	8.7	0.23993	0.21481	0.0608	0.06069	0.26087	0.23574	0.02094	0.02093	1e-05	0.000162602	0	m	uninfected	1.1743	1.0206	0.8717	1.3232	0.3026	17.6	1.0821	0.0615
91	8.2	0.20475	0.20189	0.05706	0.05696	0.22499	0.22159	0.02024	0.0197	0.00054	0.00772532	0.75	m	uninfected	1.4052	1.0221	1.1113	1.316	0.2939	17.8	1.092	0.0699
92	7.9	0.19986	0.1664	0.04236	0.04231	0.21621	0.18266	0.01635	0.01626	9e-05	0.00114504	0	f	uninfected	1.827	1.0249	1.5038	1.3481	0.3232	20.5	1.1035	0.0786
93	7.3	0.15957	0.1374	0.04377	0.04369	0.1753	0.1521	0.01573	0.0147	0.00103	0.021281	1.51	f	uninfected	1.4166	1.0655	1.173	1.3091	0.2436	18.2	1.1139	0.0484
94	7.4	0.176	0.15255	0.037	0.03699	0.19002	0.16632	0.01402	0.01377	0.00025	0.00565611	0	m	uninfected	1.2075	1.0144	0.9904	1.2315	0.2171	16.9	1.0586	0.0442
95	7.3	0.16687	0.21721	0.03716	0.03714	0.18052	0.23045	0.01365	0.01324	0.00041	0.00611028	0.25	m	uninfected	1.4709	1.0365	1.1329	1.3745	0.338	17.9	1.1036	0.0671
96	6.8	0.16902	0.26523	0.03244	0.03253	0.18179	0.27793	0.01277	0.0127	7e-05	0.00105581	0	m	uninfected	1.6304	1.0469	1.3105	1.3668	0.3199	18.7	1.1132	0.0663
97	8.6	0.18639	0.25872	0.06461	0.06455	0.20743	0.27436	0.02104	0.01564	0.0054	0.0578778	5.38	m	uninfected	1.9891	1.0203	1.5456	1.4638	0.4435	19.5	1.1136	0.0933
98	8.6	0.20588	0.16478	0.05618	0.05622	0.22597	0.18317	0.02009	0.01839	0.0017	0.0173824	1.85	m	uninfected	1.631	1.0065	1.2174	1.4201	0.4136	18.7	1.1043	0.0978
99	8	0.15663	0.17242	0.0551	0.0551	0.17674	0.19152	0.02011	0.0191	0.00101	0.0105649	0.75	f	uninfected	1.6874	1.0441	1.251	1.4805	0.4364	19.4	1.1397	0.0956
100	7.6	0.13971	0.15377	0.04511	0.04511	0.15718	0.17055	0.01747	0.01678	0.00069	0.0105991	1.17	m	uninfected	1.4825	1.0148	1.1665	1.3308	0.316	17.4	1.0799	0.0651
101	8.5	0.16014	0.18473	0.06363	0.06359	0.18141	0.20423	0.02127	0.0195	0.00177	0.0239837	2.07	m	uninfected	1.5936	0.9912	1.2602	1.3246	0.3334	18.8	1.065	0.0738
102	7.9	0.16724	0.1809	0.04269	0.04263	0.18351	0.19715	0.01627	0.01625	2e-05	0.000331675	0	m	uninfected	1.3916	1.0213	1.0856	1.3273	0.306	17.9	1.0816	0.0603
103	7.4	0.15797	0.16306	0.03319	0.03318	0.17169	0.1763	0.01372	0.01324	0.00048	0.00486815	0.55	f	uninfected	2.0484	1.0399	1.6507	1.4376	0.3977	20.6	1.1385	0.0986
104	8.5	0.16311	0.14383	0.05012	0.05008	0.18024	0.15953	0.01713	0.0157	0.00143	0.0145325	3.05	f	uninfected	1.7851	1.0272	1.4125	1.3998	0.3726	19.3	1.1256	0.0984
105	8	0.24275	0.24929	0.04468	0.04471	0.25993	0.26284	0.01718	0.01355	0.00363	0.0432658	5.16	m	uninfected	1.7374	1.018	1.367	1.3884	0.3704	19.4	1.1019	0.0839
106	7.8	0.14846	0.176	0.04119	0.04117	0.16429	0.19177	0.01583	0.01577	6e-05	0.000567644	0	m	uninfected	1.9636	1.0209	1.4861	1.4984	0.4775	20.2	1.1266	0.1057
107	7.3	0.2029	0.18365	0.03389	0.03394	0.21574	0.19589	0.01284	0.01224	0.0006	0.00797872	0.26	f	uninfected	1.8198	1.055	1.4846	1.3902	0.3352	19.7	1.1302	0.0752
108	8.1	0.1457	0.19617	0.05308	0.05308	0.164	0.21411	0.0183	0.01794	0.00036	0.00442804	0.54	m	uninfected	1.7289	1.0298	1.2825	1.4762	0.4464	20.5	1.1111	0.0813
109	8	0.17567	0.14853	0.05158	0.0515	0.19512	0.16674	0.01945	0.01821	0.00124	0.0200972	1.47	f	uninfected	1.6946	0.9844	1.4472	1.2318	0.2474	18.6	1.0461	0.0617
110	8.3	0.16799	0.16329	0.053	0.05299	0.18722	0.18199	0.01923	0.0187	0.00053	0.00637786	0.7	f	uninfected	1.6418	0.9966	1.3318	1.3066	0.31	19.6	1.0797	0.0831
111	7.4	0.18206	0.15725	0.0459	0.04588	0.19901	0.17419	0.01695	0.01694	1e-05	0.000168919	0	f	uninfected	1.185	1.0461	0.9208	1.3103	0.2642	17.2	1.1053	0.0592
112	7.4	0.14521	0.1663	0.04922	0.04922	0.1623	0.18337	0.01709	0.01707	2e-05	0.000347826	0	f	uninfected	1.3863	1.005	1.1258	1.2655	0.2605	18.6	1.0625	0.0575
113	7.2	0.24783	0.17588	0.0456	0.04563	0.26382	0.18856	0.01599	0.01268	0.00331	0.0427649	2.42	f	uninfected	1.6083	1.02	1.2841	1.3442	0.3242	18.6	1.0974	0.0774
114	6.2	0.14427	0.18369	0.03561	0.03554	0.1576	0.1968	0.01333	0.01311	0.00022	0.00319767	0.29	f	uninfected	1.5669	1.0095	1.2609	1.3155	0.306	17.9	1.0783	0.0688
115	7.6	0.14389	0.1957	0.04538	0.04539	0.16038	0.21214	0.01649	0.01644	5e-05	0.000620347	0	f	uninfected	1.8642	1.025	1.5201	1.3691	0.3441	19.5	1.1056	0.0806
116	7.5	0.15716	0.16604	0.04511	0.04504	0.17406	0.18121	0.0169	0.01517	0.00173	0.0290756	2.19	m	uninfected	1.5899	1.0393	1.289	1.3402	0.3009	18.5	1.0988	0.0595
117	6.8	0.16271	0.15358	0.03769	0.0376	0.17734	0.16766	0.01463	0.01408	0.00055	0.00814815	0.85	f	uninfected	1.4193	1.0293	1.1538	1.2948	0.2655	17.9	1.0968	0.0675
118	8.8	0.158	0.14463	0.06196	0.06199	0.17801	0.16414	0.02001	0.01951	0.0005	0.01002	0.72	m	uninfected	1.3276	1.0097	1.1037	1.2336	0.2239	16.9	1.0596	0.0499
119	8	0.15007	0.17366	0.05017	0.05015	0.16657	0.19001	0.0165	0.01635	0.00015	0.00208623	0	m	uninfected	1.5001	1.0241	1.2184	1.3058	0.2817	18.5	1.096	0.0719
120	7.6	0.18023	0.1968	0.04559	0.04556	0.19587	0.21223	0.01564	0.01543	0.00021	0.00306122	0.5	m	uninfected	1.369	1.0124	1.0544	1.327	0.3146	18.9	1.081	0.0686
C-1	8	0.16336	0.19619	0.04525	0.04521	0.18044	0.21326	0.01708	0.01707	1e-05	0.01706	0	n/a	Control	n/a	n/a	n/a	n/a	n/a	n/a	n/a	n/a
C-2	7.4	0.17136	0.21288	0.04602	0.04609	0.18602	0.22758	0.01466	0.0147	-4e-05	0.01474	0	n/a	Control	n/a	n/a	n/a	n/a	n/a	n/a	n/a	n/a
C-3	7.2	0.21962	0.17378	0.03224	0.03222	0.23216	0.18632	0.01254	0.01254	0	0	0	n/a	Control	n/a	n/a	n/a	n/a	n/a	n/a	n/a	n/a
C-4	6.8	0.25895	0.18312	0.03012	0.03021	0.26878	0.19291	0.00983	0.00979	4e-05	0.00975	0	n/a	Control	n/a	n/a	n/a	n/a	n/a	n/a	n/a	n/a
C-5	7.8	0.18363	0.16616	0.04327	0.04322	0.19933	0.18181	0.0157	0.01565	5e-05	0.0156	0	n/a	Control	n/a	n/a	n/a	n/a	n/a	n/a	n/a	n/a
C-6	7.3	0.20873	0.17438	0.03892	0.03889	0.22461	0.19034	0.01588	0.01596	-8e-05	0.01604	0	n/a	Control	n/a	n/a	n/a	n/a	n/a	n/a	n/a	n/a
C-7	6.8	0.16535	0.20116	0.04245	0.04247	0.179	0.21474	0.01365	0.01358	7e-05	0.01351	0	n/a	Control	n/a	n/a	n/a	n/a	n/a	n/a	n/a	n/a
C-8	6.8	0.22106	0.16334	0.03871	0.03868	0.23418	0.17645	0.01312	0.01311	1e-05	0.0131	0	n/a	Control	n/a	n/a	n/a	n/a	n/a	n/a	n/a	n/a
C-9	8.5	0.15772	0.17013	0.04036	0.04033	0.17504	0.18743	0.01732	0.0173	2e-05	0.01728	0	n/a	Control	n/a	n/a	n/a	n/a	n/a	n/a	n/a	n/a
C-10	8.4	0.19437	0.19009	0.04819	0.04821	0.21155	0.20726	0.01718	0.01717	1e-05	0.01716	0	n/a	Control	n/a	n/a	n/a	n/a	n/a	n/a	n/a	n/a
C-11	7	0.19133	0.20298	0.04193	0.04193	0.20443	0.21608	0.0131	0.0131	0	0.0131	0	n/a	Control	n/a	n/a	n/a	n/a	n/a	n/a	n/a	n/a
C-12	8.9	0.17406	0.17109	0.06802	0.06804	0.1973	0.19428	0.02324	0.02319	5e-05	0.02314	0	n/a	Control	n/a	n/a	n/a	n/a	n/a	n/a	n/a	n/a
C-13	7.7	0.18867	0.21071	0.06172	0.0617	0.20729	0.22933	0.01862	0.01862	0	0.01862	0	n/a	Control	n/a	n/a	n/a	n/a	n/a	n/a	n/a	n/a
C-14	7.6	0.21857	0.20279	0.05077	0.05075	0.23524	0.21936	0.01667	0.01657	0.0001	0.01647	0	n/a	Control	n/a	n/a	n/a	n/a	n/a	n/a	n/a	n/a
C-15	7.6	0.18897	0.16944	0.04308	0.04309	0.20418	0.18465	0.01521	0.01521	0	0.01521	0	n/a	Control	n/a	n/a	n/a	n/a	n/a	n/a	n/a	n/a

## Sheet: II. Experimental Infection
Initial Grazing Assay (Before Experimental Infection)													Final Grazing Assay (After Experimental Infection)											Snail Metrics
Infection status	Cup	Leaf Width (cm)	Ungrazed foil weight (g)	Grazed foil weight (g)	Ungrazed Leaf Wet Weight (g)	Grazed Leaf Wet Weight (g)	Ungrazed Leaf Dry Weight with foil (g)	Grazed Leaf Dry Weight with foil (g)	Ungrazed dry weight (g)	Grazed dry Weight (g)	Difference in dry weights (g)	radulations (cm)	Infection status	Cup	Leaf Width (cm)	Ungrazed foil weight (g)	Grazed foil weight (g)	Ungrazed Leaf Dry Weight with foil (g)	Grazed Leaf Dry Weight with foil (g)	Ungrazed dry weight (g)	Grazed dry Weight (g)	Difference in dry weights (g)	radulations (cm)	Sex	Snail tin Weight (g)	Snail dry weight (w/ tin) (g)	Snail dry biomass (g)	Shell Weight (g)	snail length (mm)
uninfected	1	0.8	0.22019	0.196	0.03675	0.03677	0.23274	0.20772	0.01255	0.01172	0.00083	2.3	infected	1	0.75	0.2019	0.20388	0.21753	0.21941	0.01563	0.01553	0.0001	0.25	f	1.6917	1.7626	0.0709	1.48056	20.8
uninfected	2	0.82	0.18536	0.20171	0.03827	0.03822	0.19839	0.21074	0.01303	0.00903	0.004	5.48	infected	2	0.74	0.17613	0.17552	0.19512	0.19424	0.01899	0.01872	0.00027	0.25	f	1.3745	1.4191	0.0446	1.23208	18.4
uninfected	3	0.68	0.17298	0.22643	0.04102	0.04102	0.18596	0.23801	0.01298	0.01158	0.0014	2.23	infected	3	0.79	0.17082	0.19376	0.18631	0.20918	0.01549	0.01542	7e-05	0	f	1.2712	1.3437	0.0725	1.64834	19.7
uninfected	4	0.79	0.17381	0.22843	0.04487	0.0449	0.19152	0.24054	0.01771	0.01211	0.0056	4.5	infected	4	0.8	0.16289	0.17679	0.17883	0.19191	0.01594	0.01512	0.00082	1.32	f	1.2956	1.3687	0.0731	1.51258	20.9
uninfected	5	0.74	0.21327	0.20402	0.06103	0.06102	0.23283	0.22178	0.01956	0.01776	0.0018	1.23	infected	5	0.68	0.17055	0.18055	0.19105	0.20032	0.0205	0.01977	0.00073	0	m	1.8216	1.9016	0.08	1.52834	19.7
uninfected	6	0.8	0.20045	0.21595	0.04356	0.04359	0.2147	0.2276	0.01425	0.01165	0.0026	2.39	infected	6	0.79	0.19385	0.17519	0.20915	0.19043	0.0153	0.01524	6e-05	0	f	1.5191	1.6052	0.0861	1.31026	19.3
uninfected	7	0.77	0.19734	0.19211	0.04802	0.04798	0.2143	0.20817	0.01696	0.01606	0.0009	3.64	infected	7	0.7	0.1965	0.17426	0.21345	0.19031	0.01695	0.01605	0.0009	0.55	m	1.8218	1.8708	0.049	1.43198	17.9
uninfected	8	0.82	0.18655	0.15075	0.04734	0.04741	0.20282	0.16623	0.01627	0.01548	0.00079	0.26	infected	8	0.76	0.23136	0.16604	0.24712	0.18162	0.01576	0.01558	0.00018	0.83	m	1.6648	1.7444	0.0796	1.57268	21.4
uninfected	9	0.83	0.15333	0.15811	0.0638	0.0631	0.17362	0.1773	0.02029	0.01919	0.0011	1.67	infected	9	0.68	0.18641	0.15905	0.20047	0.17284	0.01406	0.01379	0.00027	0	f	1.9598	2.0155	0.0557	1.41622	19.1
uninfected	10	0.78	0.15236	0.18186	0.033695	0.033692	0.16541	0.19118	0.01305	0.00932	0.00373	4.52	infected	10	0.76	0.15851	0.15864	0.1726	0.17268	0.01409	0.01404	5e-05	0	m	1.6315	1.7051	0.0736	1.75682	22.1
uninfected	11	0.72	0.18148	0.19665	0.04251	0.04251	0.19697	0.21104	0.01549	0.01439	0.0011	1.67	infected	11	0.78	0.19412	0.22846	0.20991	0.24417	0.01579	0.01571	8e-05	0	f	1.1902	1.2538	0.0636	1.30026	19.3
uninfected	12	0.8	0.23007	0.17673	0.04372	0.04377	0.24335	0.18909	0.01328	0.01236	0.00092	0.98	infected	12	0.69	0.21903	0.2075	0.2384	0.2268	0.01937	0.0193	7e-05	0	m	1.4065	1.4524	0.0459	1.38006	18.3
uninfected	13	0.82	0.17976	0.15673	0.04226	0.0422	0.1935	0.16611	0.01374	0.00938	0.00436	5	infected	13	0.71	0.19234	0.16348	0.21243	0.18298	0.02009	0.0195	0.00059	1.12	f	1.275	1.3142	0.0392	1.47228	19.4
uninfected	14	0.73	0.15562	0.14853	0.04803	0.04794	0.17168	0.16419	0.01606	0.01566	0.0004	0	infected	14	0.68	0.20725	0.22935	0.22032	0.24206	0.01307	0.01271	0.00036	0	m	1.5601	1.6068	0.0467	1.49238	19.9
uninfected	15	0.8	0.18392	0.22492	0.0503	0.05036	0.19956	0.23726	0.01564	0.01234	0.0033	3.73	infected	15	0.8	0.15146	0.19916	0.16627	0.21393	0.01481	0.01477	4e-05	0	m	1.7874	1.8432	0.0558	1.5646	21
uninfected	16	0.8	0.21031	0.148	0.05995	0.06004	0.23036	0.16375	0.02005	0.01575	0.0043	2.54	uninfected	16	0.75	0.21637	0.18278	0.23346	0.19787	0.01709	0.01509	0.002	2.54	f	1.0201	1.0773	0.0572	1.45046	20.3
uninfected	17	0.72	0.1997	0.20169	0.03483	0.03472	0.21297	0.21409	0.01327	0.0124	0.00087	1.56	uninfected	17	0.71	0.1688	0.22744	0.18688	0.24463	0.01808	0.01719	0.00089	3.24	m	1.2214	1.2732	0.0518	1.52814	18.7
uninfected	18	0.77	0.16425	0.20378	0.05352	0.0535	0.18273	0.21956	0.01848	0.01578	0.0027	2.12	uninfected	18	0.81	0.1813	0.22707	0.19769	0.24106	0.01639	0.01399	0.0024	3.2	f	1.0991	1.1546	0.0555	1.52814	18.7
uninfected	19	0.67	0.16091	0.2304	0.04432	0.04439	0.17731	0.2458	0.0164	0.0154	0.001	1.22	uninfected	19	0.7	0.17473	0.15622	0.19082	0.17189	0.01609	0.01567	0.00042	0.25	m	1.8234	1.8827	0.0593	1.34844	20.2
uninfected	20	0.73	0.20614	0.21312	0.04643	0.04642	0.22184	0.22822	0.0157	0.0151	0.0006	1.8	uninfected	20	0.74	0.17306	0.16464	0.18899	0.17777	0.01593	0.01313	0.0028	2.87	f	1.5505	1.6195	0.069	1.34834	19.7
uninfected	21	0.77	0.17949	0.15671	0.04842	0.04855	0.19399	0.17057	0.0145	0.01386	0.00064	0.31	uninfected	21	0.72	0.22432	0.16592	0.23993	0.18069	0.01561	0.01477	0.00084	0.44	f	1.8017	1.8591	0.0574	1.66662	21.1
uninfected	22	0.79	0.15217	0.18441	0.03655	0.03664	0.16562	0.19566	0.01345	0.01125	0.0022	3	uninfected	22	0.83	0.20548	0.20488	0.21832	0.21482	0.01284	0.00994	0.0029	1.43	f	1.4657	1.5117	0.046	1.60066	21.3
uninfected	23	0.81	0.20572	0.17603	0.05204	0.05197	0.22575	0.19547	0.02003	0.01944	0.00059	0	uninfected	23	0.8	0.15125	0.20857	0.16461	0.21873	0.01336	0.01016	0.0032	1.28	m	1.8005	1.8475	0.047	1.42642	19
uninfected	24	0.77	0.23087	0.16852	0.05923	0.0593	0.24964	0.18299	0.01877	0.01447	0.0043	3.5	uninfected	24	0.8	0.19615	0.16265	0.21169	0.17749	0.01554	0.01484	0.0007	0	m	1.1082	1.1951	0.0869	1.60874	21.7
uninfected	25	0.8	0.14669	0.14965	0.04904	0.04908	0.16165	0.16231	0.01496	0.01266	0.0023	1	uninfected	25	0.71	0.21045	0.14877	0.22501	0.16083	0.01456	0.01206	0.0025	2.03	m	1.1701	1.2211	0.051	1.49662	21.1
uninfected	26	0.83	0.16586	0.19562	0.03662	0.03655	0.17931	0.20846	0.01345	0.01284	0.00061	0.56	uninfected	26	0.78	0.18903	0.22991	0.20916	0.24944	0.02013	0.01953	0.0006	0.78	f	1.0462	1.0974	0.0512	1.41632	19.6
uninfected	27	0.82	0.18438	0.15645	0.03685	0.03675	0.19763	0.1658	0.01325	0.00935	0.0039	1.3	uninfected	27	0.83	0.20283	0.22838	0.21487	0.23984	0.01204	0.01146	0.00058	1.56	f	1.0249	1.1046	0.0797	1.4854	20.7
uninfected	28	0.74	0.207	0.21746	0.04597	0.04605	0.22303	0.23278	0.01603	0.01532	0.00071	0.25	uninfected	28	0.72	0.21811	0.1817	0.238	0.20076	0.01989	0.01906	0.00083	1.49	f	1.7758	1.8195	0.0437	1.5243	19.5
uninfected	29	0.77	0.23108	0.2241	0.03625	0.03619	0.24493	0.23701	0.01385	0.01291	0.00094	0.85	uninfected	29	0.72	0.21413	0.19172	0.23449	0.20798	0.02036	0.01626	0.0041	1.32	m	1.1557	1.2129	0.0572	1.58076	21.8
uninfected	30	0.82	0.18133	0.20761	0.04832	0.04829	0.19843	0.22371	0.0171	0.0161	0.001	2.5	uninfected	30	0.81	0.16335	0.21801	0.17541	0.22827	0.01206	0.01026	0.0018	1.85	f	1.4498	1.5082	0.0584	1.37622	19.1
na	C-1	0.75	0.20097	0.18331	0.05749	0.05741	0.21956	0.20184	0.01859	0.01853	6e-05	0	na	C-1	0.72	0.17376	0.22161	0.18814	0.2359	0.01438	0.01429	9e-05	0	na	na	na	na	na	na
na	C-2	0.77	0.23059	0.2132	0.03187	0.03189	0.24359	0.22612	0.013	0.01292	8e-05	0	na	C-2	0.8	0.17061	0.21814	0.19006	0.23757	0.01945	0.01943	2e-05	0	na	na	na	na	na	na
na	C-3	0.81	0.15915	0.21124	0.0521	0.05211	0.17804	0.23007	0.01889	0.01883	6e-05	0	na	C-3	0.78	0.22956	0.17213	0.24491	0.18748	0.01535	0.01535	0	0	na	na	na	na	na	na
na	C-4	0.73	0.18472	0.15233	0.04214	0.04209	0.19968	0.16724	0.01496	0.01491	5e-05	0	na	C-4	0.73	0.17847	0.15362	0.19314	0.16828	0.01467	0.01466	1e-05	0	na	na	na	na	na	na
na	C-5	0.78	0.21337	0.20367	0.0556	0.05566	0.23371	0.22399	0.02034	0.02032	2e-05	0	na	C-5	0.78	0.18318	0.20754	0.19887	0.22321	0.01569	0.01567	2e-05	0	na	na	na	na	na	na
na	C-6	0.65	0.17645	0.19224	0.0585	0.05854	0.1966	0.21238	0.02015	0.02014	1e-05	0	na	C-6	0.74	0.1985	0.18824	0.21244	0.20215	0.01394	0.01391	3e-05	0	na	na	na	na	na	na
na	C-7	0.75	0.18314	0.14744	0.04218	0.04214	0.19896	0.16325	0.01582	0.01581	1e-05	0	na	C-7	0.72	0.17224	0.17334	0.18635	0.18739	0.01411	0.01405	6e-05	0	na	na	na	na	na	na
na	C-8	0.72	0.21665	0.15201	0.03173	0.03179	0.22886	0.16422	0.01221	0.01221	0	0	na	C-8	0.81	0.19283	0.22103	0.21064	0.23884	0.01781	0.01781	0	0	na	na	na	na	na	na
na	C-9	0.75	0.21257	0.14941	0.04064	0.04067	0.22893	0.16574	0.01636	0.01633	3e-05	0	na	C-9	0.72	0.1867	0.16477	0.20554	0.18355	0.01884	0.01878	6e-05	0	na	na	na	na	na	na
na	C-10	0.77	0.20384	0.19554	0.03659	0.03655	0.21729	0.2089	0.01345	0.01336	9e-05	0	na	C-10	0.81	0.19008	0.1491	0.20902	0.16799	0.01894	0.01889	5e-05	0	na	na	na	na	na	na
na	C-11	0.73	0.19147	0.21756	0.0546	0.05467	0.2108	0.23685	0.01933	0.01929	4e-05	0	na	C-11	0.7	0.21346	0.15829	0.23146	0.17626	0.018	0.01797	3e-05	0	na	na	na	na	na	na
na	C-12	0.83	0.22789	0.20458	0.05171	0.05165	0.24624	0.22292	0.01835	0.01834	1e-05	0	na	C-12	0.79	0.21572	0.19791	0.23208	0.21427	0.01636	0.01636	0	0	na	na	na	na	na	na
na	C-13	0.78	0.18346	0.16092	0.04586	0.0458	0.1994	0.17686	0.01594	0.01594	0	0	na	C-13	0.69	0.20421	0.15791	0.21649	0.17011	0.01228	0.0122	8e-05	0	na	na	na	na	na	na
na	C-14	0.77	0.15428	0.21553	0.04521	0.04522	0.17016	0.23132	0.01588	0.01579	9e-05	0	na	C-14	0.79	0.18245	0.20715	0.20232	0.22697	0.01987	0.01982	5e-05	0	na	na	na	na	na	na
na	C-15	0.76	0.18096	0.16943	0.04253	0.04248	0.19616	0.18455	0.0152	0.01512	8e-05	0	na	C-15	0.73	0.17242	0.20631	0.1851	0.21898	0.01268	0.01267	1e-05	0	na	na	na	na	na	na

## Sheet: III. Snail Collection data
Collection Number	Collection Site	Location	Snails Collected	Number Infected with Parorchis	Number infected with Levinsinella carteretensis	Number infected with avian blood fluke	Percent Infected with Parorchis
1	Hoop Pole Creek, NC	Tall Spartina Zone (marsh edge)	112	0	0	0	0
2	Hoop Pole Creek, NC	Tall Spartina Zone (marsh edge)	100	1	0	0	1
3	Hoop Pole Creek, NC	Tall Spartina Zone (marsh edge)	158	2	0	0	1.26582
13	Hoop Pole Creek, NC	Intermediate Spartina Zone	164	3	0	0	1.82927
17	Hoop Pole Creek, NC	Intermediate Spartina Zone	155	3	0	0	1.93548
20	Hoop Pole Creek, NC	Die-off border (1)	150	3	0	0	2
23	Hoop Pole Creek, NC	Intermediate Spartina Zone	163	4	0	0	2.45399
14	Hoop Pole Creek, NC	Intermediate Spartina Zone	200	6	0	0	3
22	Hoop Pole Creek, NC	Intermediate Spartina Zone	100	3	0	0	3
6	Hoop Pole Creek, NC	Die-off border (2)	100	4	0	0	4
24	Hoop Pole Creek, NC	Die-off border (2	147	6	0	0	4.08163
9	Hoop Pole Creek, NC	Intermediate Spartina Zone	210	11	0	0	5.2381
21	Hoop Pole Creek, NC	Die-off border (2)	156	8	0	0	5.12821
25	Hoop Pole Creek, NC	Intermediate Spartina Zone	170	9	0	0	5.29412
12	Hoop Pole Creek, NC	Die-off border (1)	126	8	0	0	6.34921
15	Hoop Pole Creek, NC	Die-off border (1)	198	12	0	0	6.06061
8	Hoop Pole Creek, NC	Die-off border (2)	178	14	0	0	7.86517
10	Hoop Pole Creek, NC	Die-off border (1)	131	12	1	0	9.16031
16	Hoop Pole Creek, NC	Die-off border (1)	145	15	0	0	10.3448
4	Hoop Pole Creek, NC	Die-off border (1)	232	26	1	1	11.2069
5	Hoop Pole Creek, NC	Die-off border (1)	100	12	0	0	12
19	Hoop Pole Creek, NC	Die-off border (2)	100	18	0	0	18
11	Hoop Pole Creek, NC	Die-off border (2)	110	22	0	0	20
18	Hoop Pole Creek, NC	Die-off border (2)	110	25	1	0	22.7273
7	Hoop Pole Creek, NC	Die-off border (2)	101	31	2	0	30.6931
